# Supplementary material for: Locally spontaneous dynamic oxygen migration on biphenylene: a DFT study
Source: Royal Society of Chemistry journal article supplement (doi:10.1039/d3cp00925d), 2023-01-01
Supplement: d3cp00925d1.pdf [file d3cp00925d1.pdf]

***Electronic supplementary information for***

**Locally Spontaneous Dynamic Oxygen Migration on Biphenylene: A DFT Study**

Boyi Situ,<sup>a,‡</sup> Zihan Yan,<sup>a,‡</sup> Rubin Huo,<sup>a</sup> Kongbo Wang,<sup>a</sup> Liang Chen,<sup>b</sup> Zhe Zhang,<sup>a</sup> Liang Zhao,<sup>\*,a</sup> Yusong Tu<sup>\*,a</sup>

<sup>a</sup>*College of Physics Science and Technology & Microelectronics Industry Research Institute, Yangzhou University,  
Jiangsu 225009, China*

<sup>b</sup>*School of Physical Science and Technology, Ningbo University, Ningbo 315211, China*

<sup>‡</sup>Authors contribute equally to this work

<sup>\*</sup>Corresponding Authors: zhaoliang@yzu.edu.cn; ystu@yzu.edu.cn

## PS. 1. Sixty trajectories of oxygen atoms on biphenylene monolayer starting from different initial configurations

To clearly show the oxygen migrations in 60 trajectories starting from different initial configurations with 4 randomly distributed epoxy groups, we plotted color-mapped scatter figures. As listed in Fig. S1, the positions of 4 oxygen atoms were extracted and plotted as scatters of 0.05 ps interval for each trajectory, and the simulation time was mapped to different colors. The Traj\_16, Traj\_44 and Traj\_7 were used as the representative illustrations of oxygen migration in Fig. 5 in the manuscript.

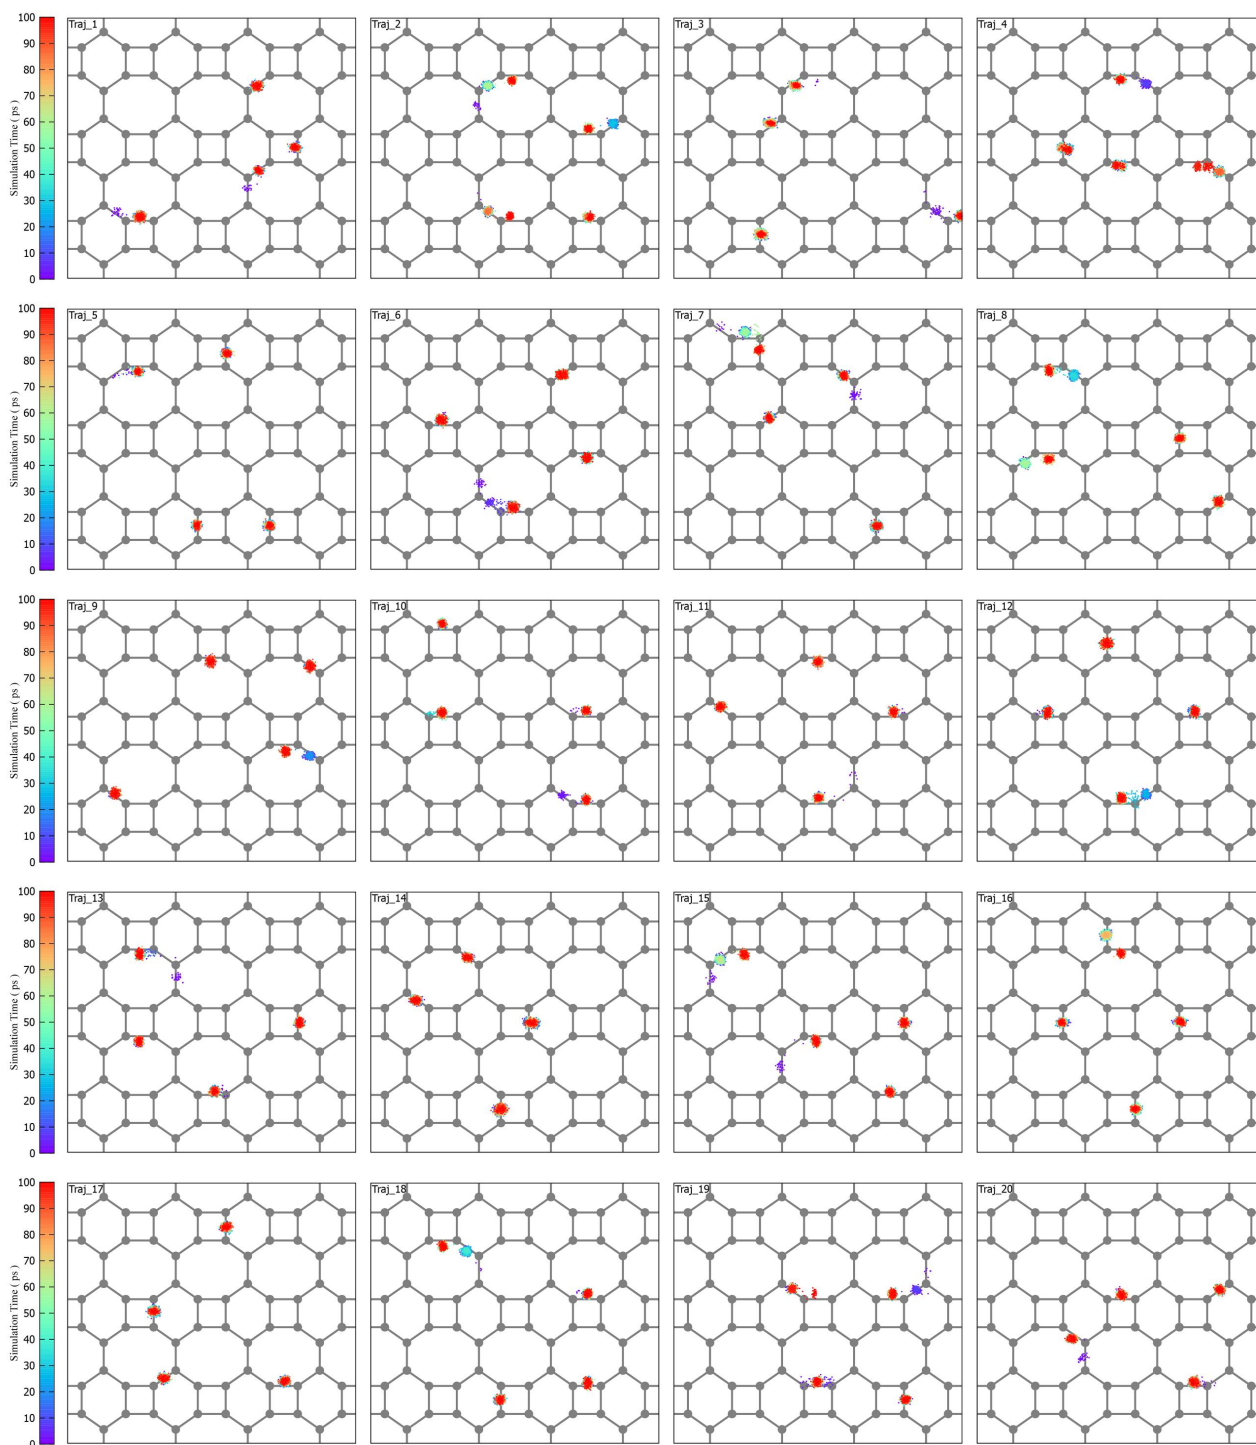

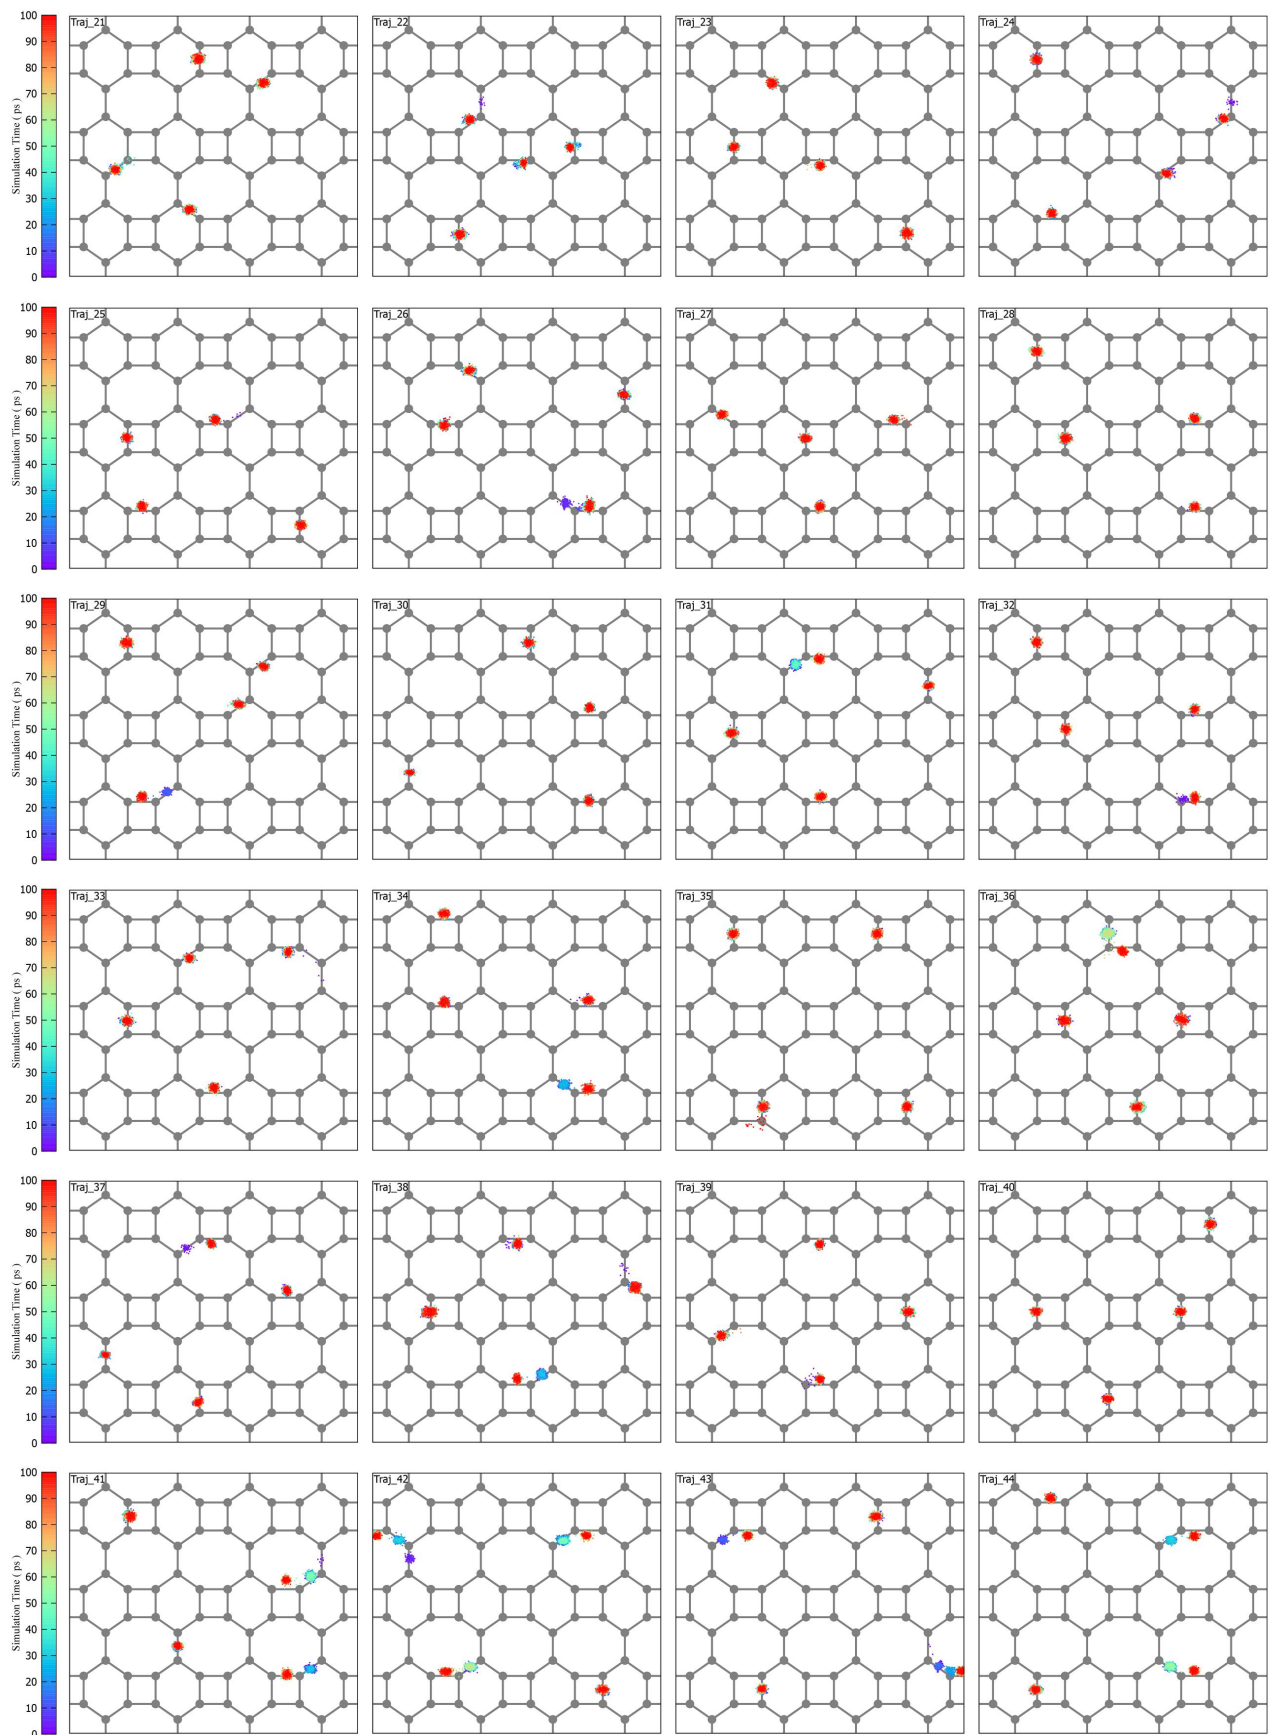

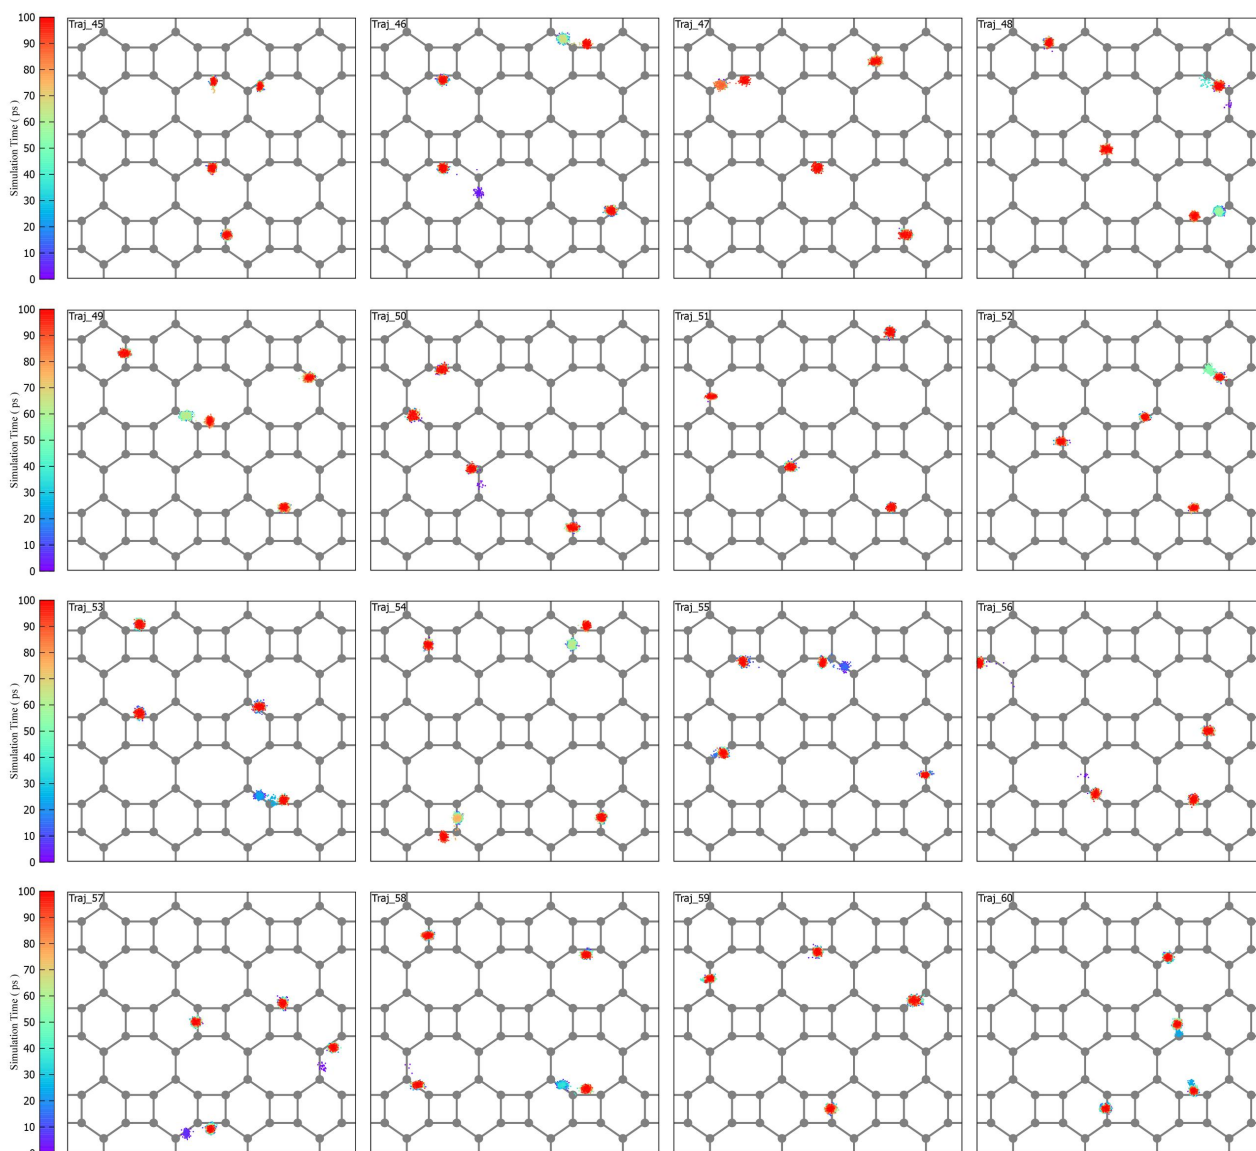

**Fig. S1** Sixty MLMD trajectories of oxygen migration on the biphenylene monolayer using the SVD-based MLFF MLMD simulations. The colored dots denote the positions of 4 oxygen atoms, and the colors denote the simulation time. The label in the upper left denotes the index of trajectory. The static biphenylene monolayer is used as the background for clarity. The surface fluctuation of the biphenylene monolayer during the MLMD simulations is not shown therefore the position of epoxy may slightly deviate from the center of C-C bond.

## PS. 2. Oxygen migration rate along different reaction pathways

**Table S1.** Calculated oxygen migration rate of different reaction pathways. Notations: attempt frequency ( $\nu$ ), an elementary length for migration ( $d$ ), energy barrier ( $\epsilon$ ), and oxygen migration rate ( $D$ ).

| Reaction pathways             | $\nu$ (THz) | $d$ (Å) | $\epsilon$ (eV) | $D$ (cm <sup>2</sup> /s) |
|-------------------------------|-------------|---------|-----------------|--------------------------|
| $B_{8-8} \rightarrow B_{6-8}$ | 16.62       | 1.20    | 0.13            | $1.58 \times 10^{-5}$    |
| $B_{6-8} \rightarrow B_{8-8}$ | 19.33       | 1.20    | 1.49            | $2.88 \times 10^{-28}$   |
| $B_{6-8} \rightarrow B_{6-8}$ | 17.75       | 1.20    | 0.81            | $6.71 \times 10^{-17}$   |
| $B_{6-8} \rightarrow T$       | 15.87       | 0.78    | 0.19            | $6.36 \times 10^{-7}$    |
| $T \rightarrow B_{6-8}$       | 4.42        | 0.78    | 0.14            | $1.22 \times 10^{-6}$    |
| $T \rightarrow B_{4-8}$       | 8.44        | 0.61    | 0.03            | $9.80 \times 10^{-5}$    |
| $B_{4-8} \rightarrow T$       | 27.83       | 0.61    | 0.26            | $4.50 \times 10^{-8}$    |
| $T \rightarrow B_{4-6}$       | 4.18        | 1.03    | 0.19            | $2.87 \times 10^{-7}$    |
| $B_{4-6} \rightarrow T$       | 13.54       | 1.03    | 0.28            | $2.88 \times 10^{-8}$    |
